# Supplementary material for: Surface plasma modification of cellulose acetate fiber filter for the adsorption of typical components in smoke components
Source: Royal Society of Chemistry journal article supplement (doi:10.1039/d3ra07624e), 2024-01-01
Supplement: d3ra07624e1.pdf [file d3ra07624e1.pdf]

## Supporting Material file for

### Surface plasma modification of cellulose acetate fiber filter for the retention and adsorption of typical components in smoke components

Baoxin Shao<sup>a</sup>, Xing Wu<sup>a</sup>, Kangzhong Shi<sup>b</sup>, Ying Zhao<sup>\*b</sup>, Jie Huang<sup>c</sup>, Wenjie Zhou<sup>c</sup>, Mengdie Cai<sup>c</sup>, Lisheng Guo<sup>\*c</sup>

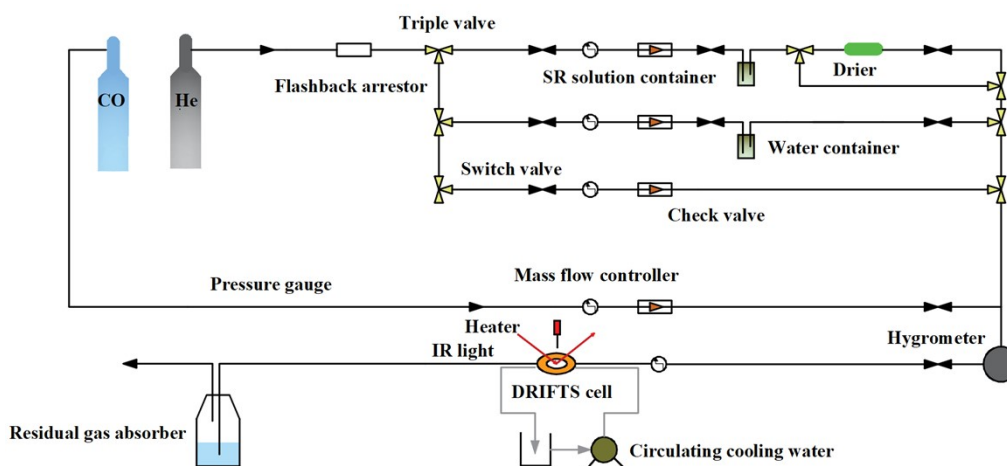

Figure S1. Schematic diagram of experimental device measured by in-situ DRIFTS.

**Table S1** Percentage of atoms in different FR samples (%)

| Sample | C     | O     |
|--------|-------|-------|
| FR     | 62.02 | 37.98 |
| FR-50  | 61.46 | 38.54 |
| FR-100 | 64.28 | 35.72 |
| FR-150 | 61.41 | 38.59 |
| FR-200 | 61.66 | 38.34 |

**Table S2** Functional groups percentage of FR samples treated at different temperature.

| Sample | Percentage content (mol %) |       |       |                               |
|--------|----------------------------|-------|-------|-------------------------------|
|        | C-C                        | C-O   | C=O   | CO <sub>3</sub> <sup>2-</sup> |
| FR     | 34.96                      | 17.98 | 31.84 | 15.22                         |
| FR-50  | 36.33                      | 17.75 | 30.21 | 15.68                         |
| FR-100 | 41.16                      | 34.33 | 19.40 | 5.09                          |
| FR-150 | 34.66                      | 17.39 | 32.31 | 15.65                         |
| FR-200 | 42.85                      | 21.78 | 27.93 | 7.44                          |

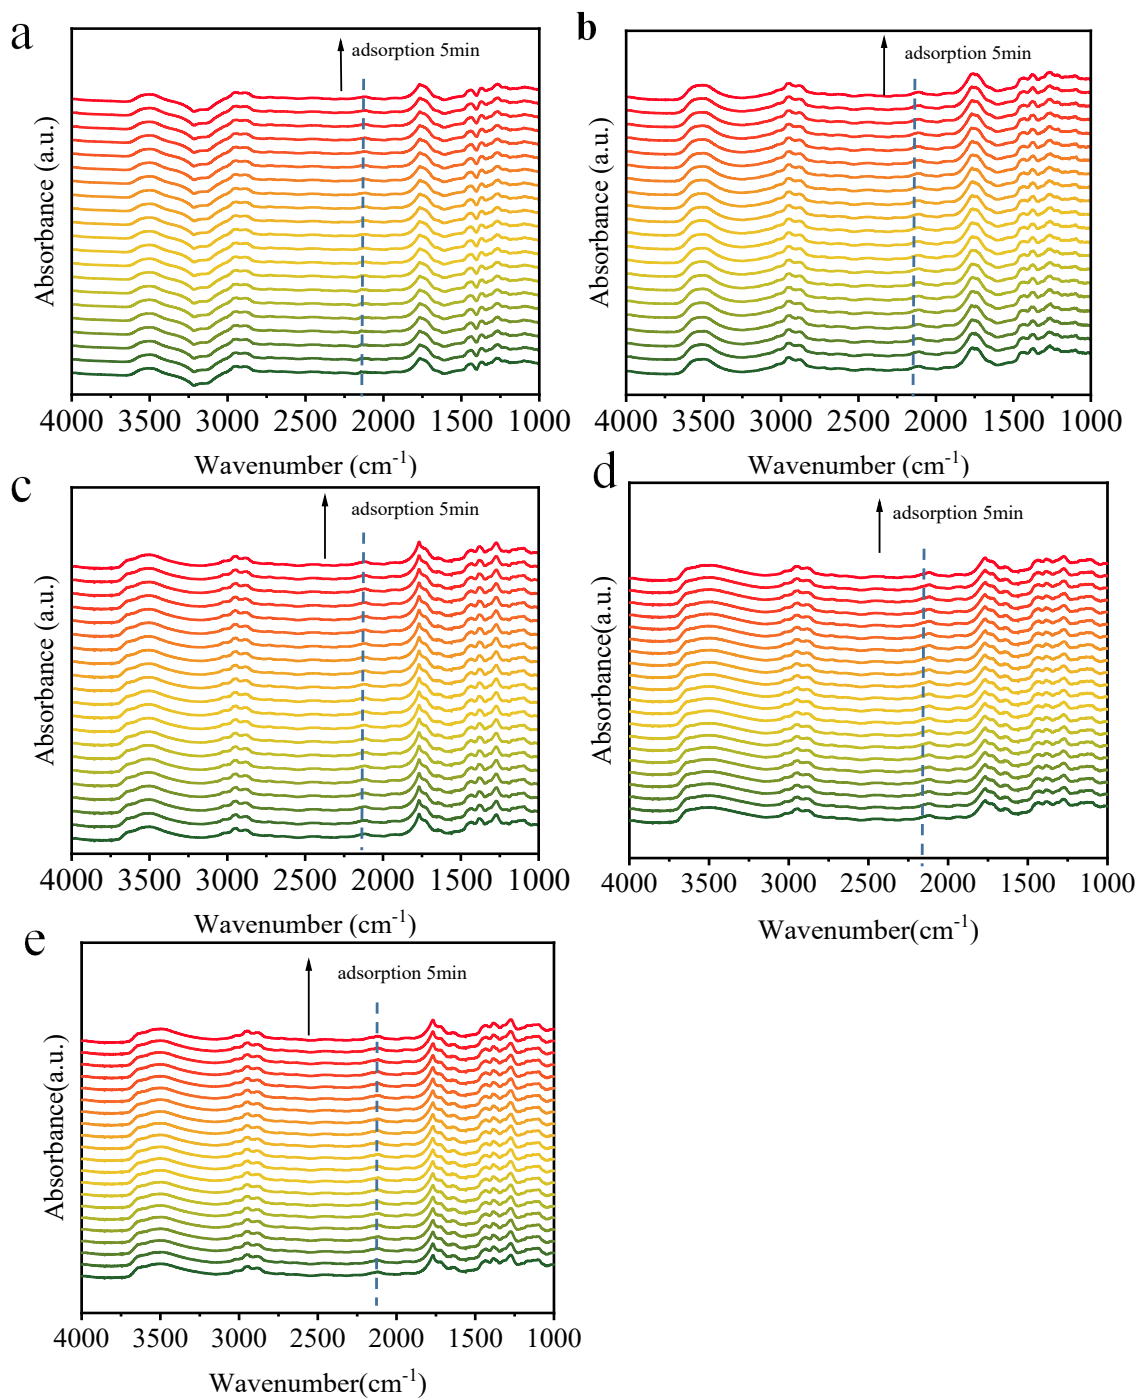

**Figure S2** *In-situ* DRIFTS spectra of dynamically adsorbed CO on FR samples are shown as a function of time. (a) FR, (b) FR-50, (c) FR-100, (d) FR-150, (e) FR-200.

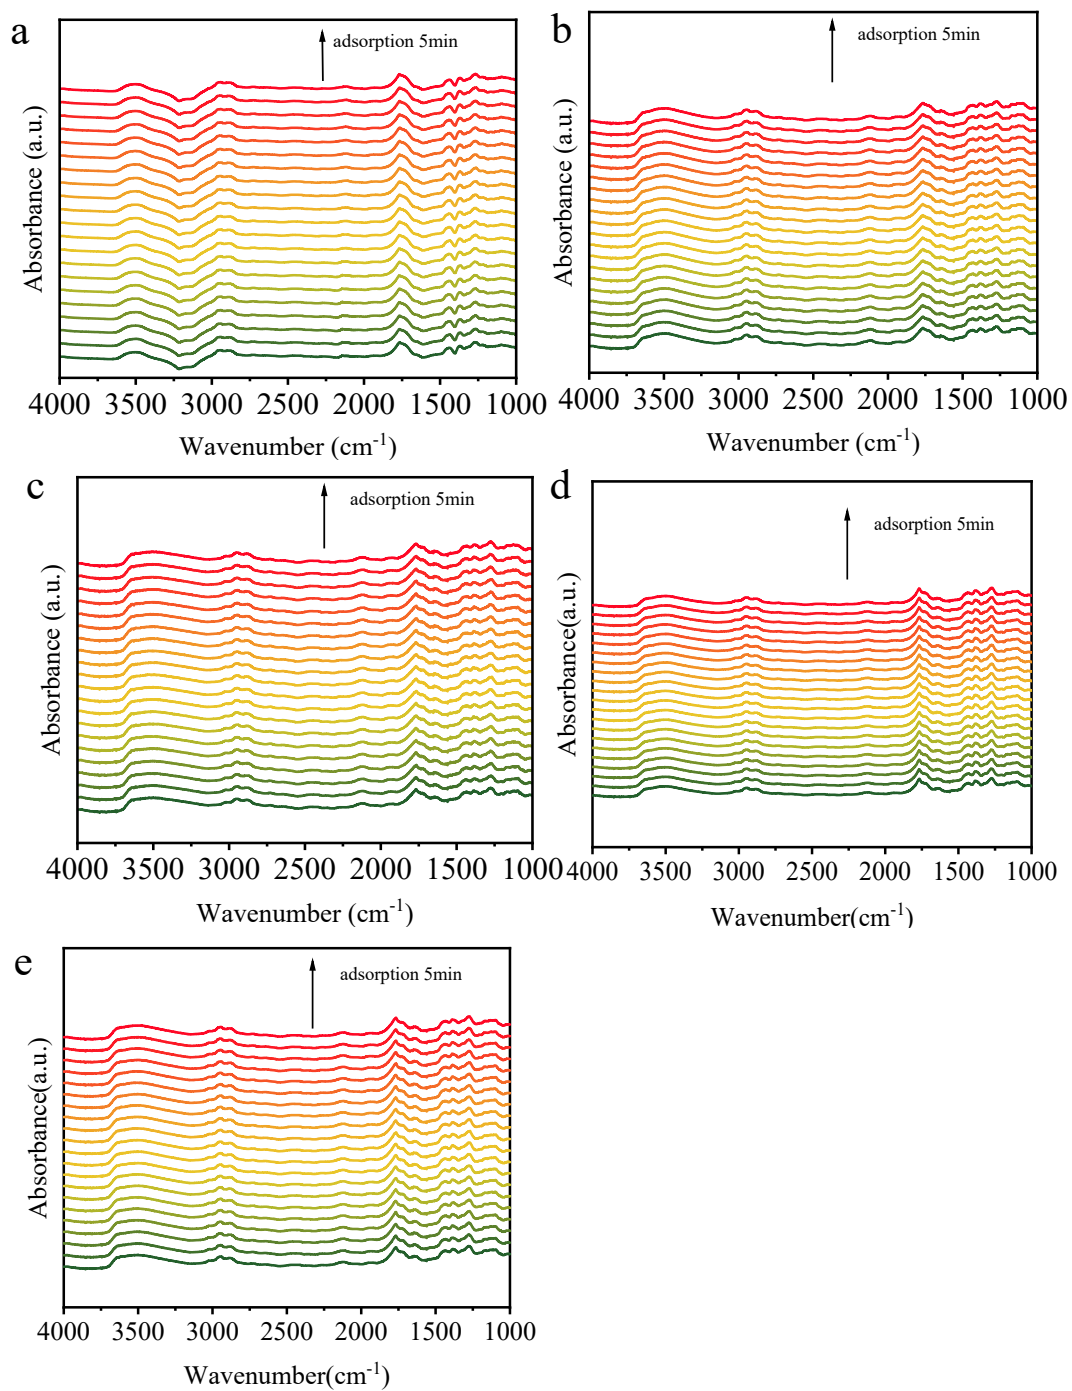

**Figure S3** *In-situ* DRIFTS spectra of dynamically adsorbed H<sub>2</sub>O on FR samples are shown as a function of time. (a) FR, (b) FR-50, (c) FR-100, (d) FR-150, (e) FR-200.

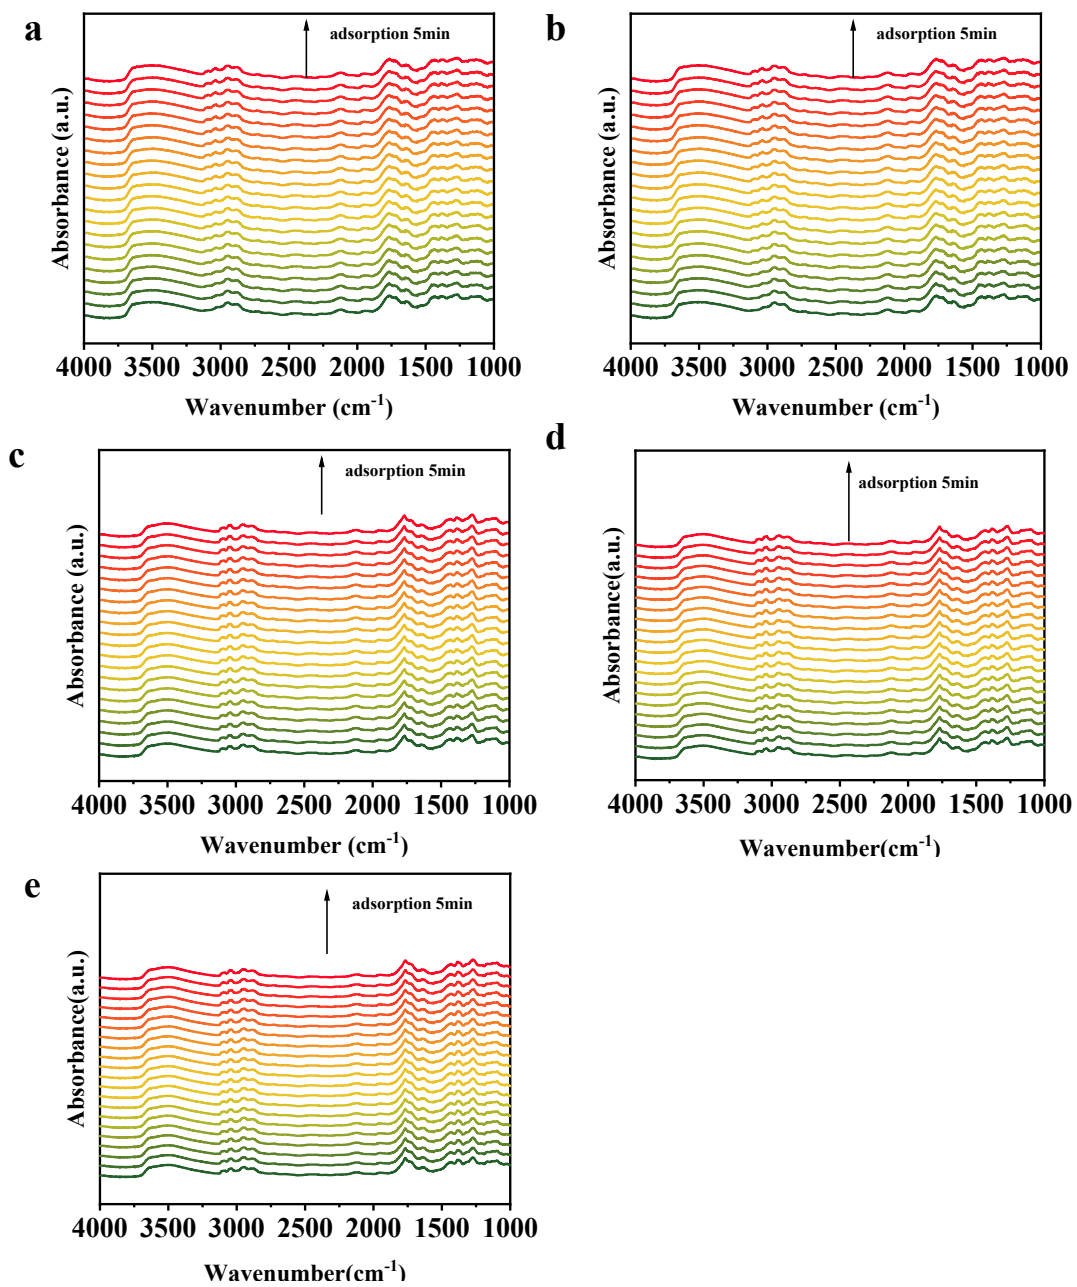

**Figure S4** *In-situ* DRIFTS spectra of dynamically adsorbed benzene on FR samples are shown as a function of time. (a) FR, (b) FR-50, (c) FR-100, (d) FR-150, (e) FR-200.

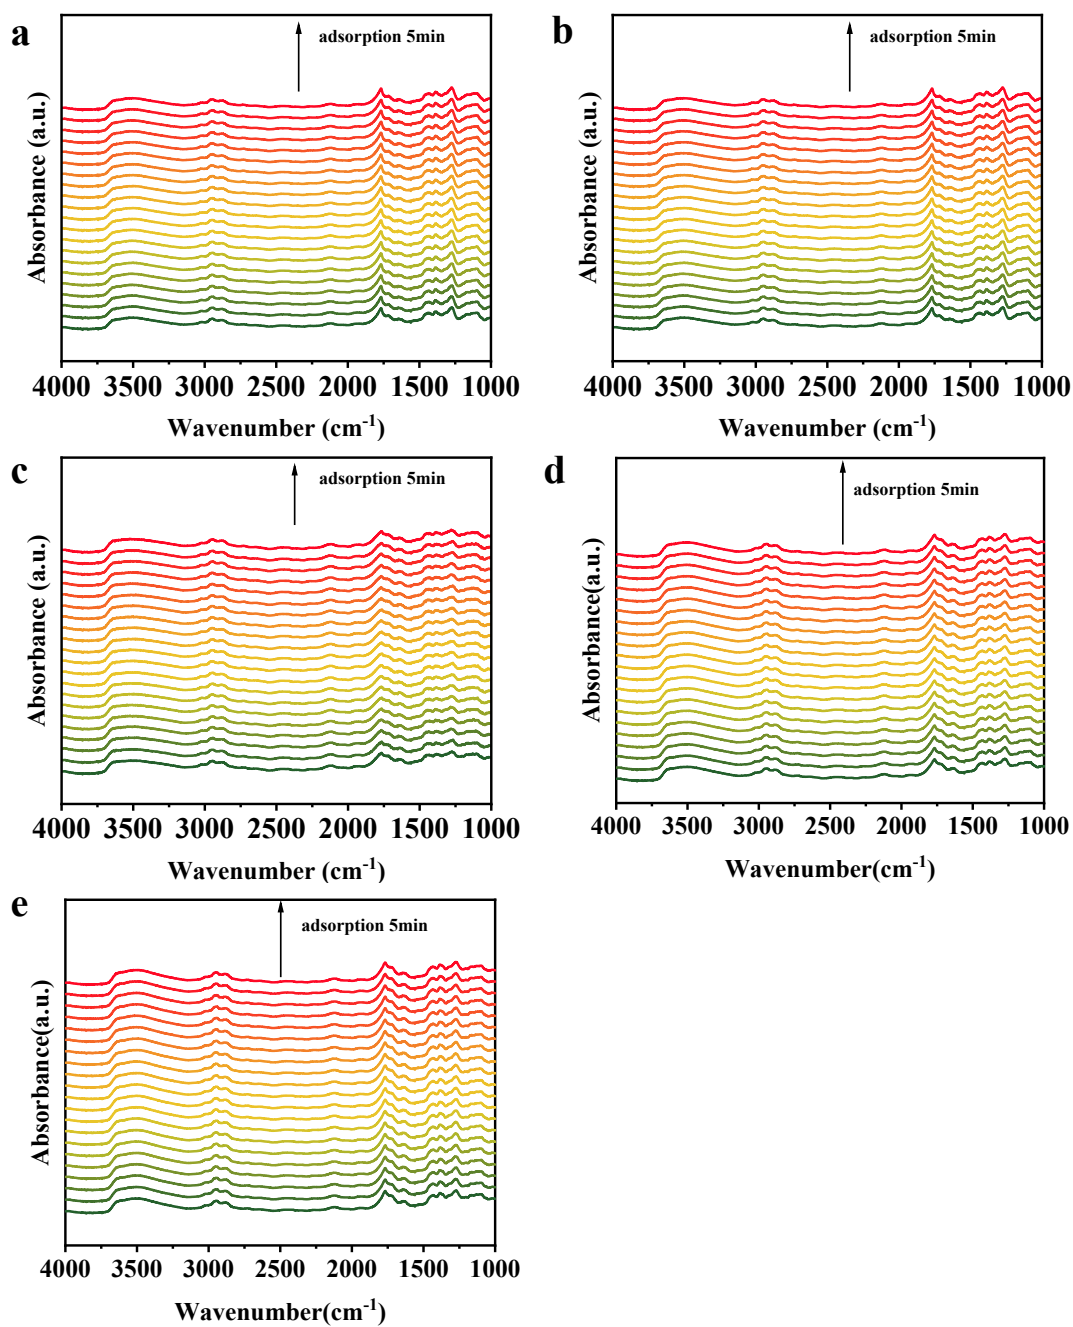

**Figure S5** *In-situ* DRIFTS spectra of dynamically adsorbed formaldehyde on FR samples are shown as a function of time. (a) FR, (b) FR-50, (c) FR-100, (d) FR-150, (e) FR-200.
